# Supplementary material
Source: PubMed Central journal article supplement (PMC5714148)
Supplement: supplementary_material.pdf [file supplementary_material.pdf]

**Supplementary File--for review**  
**the detailed statistics**

**Fig. 1A**

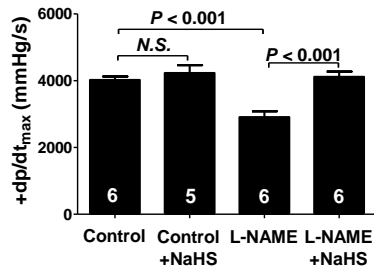

**Descriptives**

|              | N  | Mean      | Std. Deviation | Std. Error | 95% Confidence Interval for Mean |             | Minimum | Maximum |
|--------------|----|-----------|----------------|------------|----------------------------------|-------------|---------|---------|
|              |    |           |                |            | Lower Bound                      | Upper Bound |         |         |
| Control      | 6  | 4023.3933 | 252.37261      | 103.03069  | 3758.5445                        | 4288.2421   | 3623.60 | 4266.27 |
| Control+NaHS | 5  | 4231.8220 | 522.86808      | 233.83372  | 3582.5955                        | 4881.0485   | 3771.24 | 5029.79 |
| L-NAME       | 6  | 2908.6000 | 433.81852      | 177.10567  | 2453.3354                        | 3363.8646   | 2689.30 | 3780.48 |
| L-NAME+NaHS  | 6  | 4114.6767 | 387.03858      | 158.00784  | 3708.5046                        | 4520.8487   | 3457.67 | 4497.28 |
| Total        | 23 | 3801.7013 | 663.85290      | 138.42290  | 3514.6298                        | 4088.7728   | 2689.30 | 5029.79 |

**ANOVA**

|                | Sum of Squares | df | Mean Square | F      | Sig. |
|----------------|----------------|----|-------------|--------|------|
| Between Groups | 6593404        | 3  | 2197801.434 | 13.462 | .000 |
| Within Groups  | 3102011        | 19 | 163263.717  |        |      |
| Total          | 9695415        | 22 |             |        |      |

**Fig. 1B**

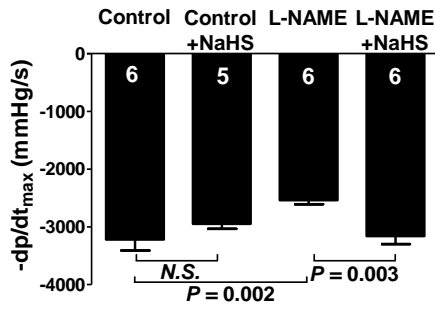

**Descriptives**

value

|              | N  | Mean     | Std. Deviation | Std. Error | 95% Confidence Interval for Mean |             | Minimum  | Maximum  |
|--------------|----|----------|----------------|------------|----------------------------------|-------------|----------|----------|
|              |    |          |                |            | Lower Bound                      | Upper Bound |          |          |
| Control      | 6  | -3220.88 | 465.92613      | 190.21355  | -3709.8362                       | -2731.9172  | -3971.91 | -2798.30 |
| Control+NaHS | 5  | -2947.79 | 194.88419      | 87.15486   | -3189.7747                       | -2705.8133  | -3246.39 | -2743.63 |
| L-NAME       | 6  | -2538.87 | 169.41306      | 69.16259   | -2716.6614                       | -2361.0852  | -2787.89 | -2317.81 |
| L-NAME+NaHS  | 6  | -3159.91 | 338.51534      | 138.19831  | -3515.1551                       | -2804.6549  | -3757.53 | -2799.45 |
| Total        | 23 | -2967.69 | 408.17802      | 85.11100   | -3144.2007                       | -2791.1819  | -3971.91 | -2317.81 |

**ANOVA**

value

|                | Sum of Squares | df | Mean Square | F     | Sig. |
|----------------|----------------|----|-------------|-------|------|
| Between Groups | 1711582        | 3  | 570527.407  | 5.548 | .007 |
| Within Groups  | 1953822        | 19 | 102832.754  |       |      |
| Total          | 3665405        | 22 |             |       |      |

**Fig. 1C**

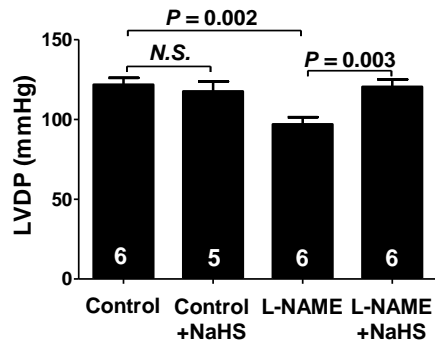

**Descriptives**

value

|              | N  | Mean     | Std. Deviation | Std. Error | 95% Confidence Interval for Mean |             | Minimum | Maximum |
|--------------|----|----------|----------------|------------|----------------------------------|-------------|---------|---------|
|              |    |          |                |            | Lower Bound                      | Upper Bound |         |         |
| Control      | 6  | 121.7083 | 10.63703       | 4.34255    | 110.5455                         | 132.8712    | 112.07  | 138.76  |
| Control+NaHS | 5  | 117.5880 | 13.92068       | 6.22552    | 100.3032                         | 134.8728    | 99.09   | 134.38  |
| L-NAME       | 6  | 97.9533  | 9.19434        | 3.75357    | 88.3045                          | 107.6022    | 80.78   | 104.56  |
| L-NAME+NaHS  | 6  | 120.4367 | 11.21710       | 4.57936    | 108.6650                         | 132.2083    | 107.45  | 138.15  |
| Total        | 23 | 114.2839 | 14.46823       | 3.01683    | 108.0274                         | 120.5404    | 80.78   | 138.76  |

**ANOVA**

value

|                | Sum of Squares | df | Mean Square | F     | Sig. |
|----------------|----------------|----|-------------|-------|------|
| Between Groups | 2212.582       | 3  | 737.527     | 5.857 | .005 |
| Within Groups  | 2392.671       | 19 | 125.930     |       |      |
| Total          | 4605.253       | 22 |             |       |      |

**Fig. 1D**

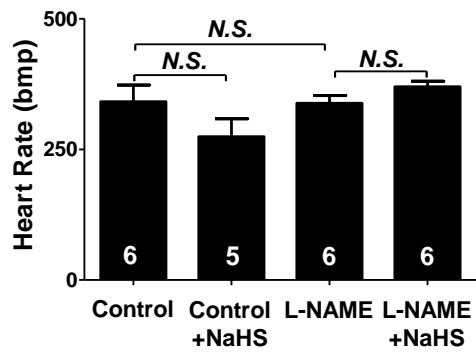

**Descriptives**

value

|              | N  | Mean     | Std. Deviation | Std. Error | 95% Confidence Interval for Mean |             | Minimum | Maximum |
|--------------|----|----------|----------------|------------|----------------------------------|-------------|---------|---------|
|              |    |          |                |            | Lower Bound                      | Upper Bound |         |         |
| Control      | 6  | 341.1667 | 78.17267       | 31.91386   | 259.1295                         | 423.2039    | 271.00  | 475.00  |
| Control+NaHS | 5  | 274.2000 | 76.41139       | 34.17221   | 179.3227                         | 369.0773    | 212.00  | 385.00  |
| L-NAME       | 6  | 338.3333 | 35.25148       | 14.39136   | 301.3392                         | 375.3275    | 292.00  | 380.00  |
| L-NAME+NaHS  | 6  | 369.8333 | 26.34704       | 10.75614   | 342.1838                         | 397.4829    | 324.00  | 403.00  |
| Total        | 23 | 333.3478 | 63.81408       | 13.30616   | 305.7525                         | 360.9431    | 212.00  | 475.00  |

**ANOVA**

value

|                | Sum of Squares | df | Mean Square | F     | Sig. |
|----------------|----------------|----|-------------|-------|------|
| Between Groups | 25995.417      | 3  | 8665.139    | 2.589 | .083 |
| Within Groups  | 63593.800      | 19 | 3347.042    |       |      |
| Total          | 89589.217      | 22 |             |       |      |

**Fig. 1E**

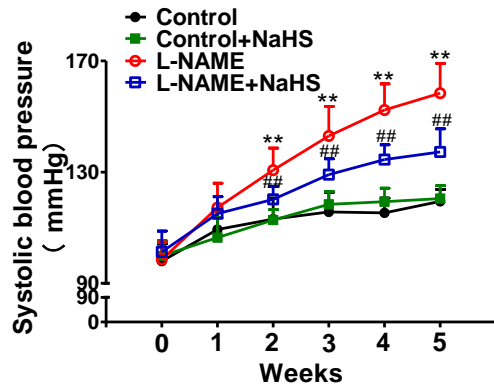

**Descriptives**

|       |              | N  | Mean     | Std. Deviation | Std. Error | 95% Confidence Interval for Mean |             | Minimum | Maximum |
|-------|--------------|----|----------|----------------|------------|----------------------------------|-------------|---------|---------|
|       |              |    |          |                |            | Lower Bound                      | Upper Bound |         |         |
| week0 | Control      | 12 | 97.9833  | 6.18462        | 1.78535    | 94.0538                          | 101.9129    | 86.53   | 107.60  |
|       | Control+NaHS | 6  | 99.8833  | 5.48249        | 2.23822    | 94.1298                          | 105.6369    | 90.40   | 105.90  |
|       | L-NAME       | 10 | 99.4140  | 6.43491        | 2.03490    | 94.8107                          | 104.0173    | 88.10   | 107.38  |
|       | L-NAME+NaHS  | 10 | 101.3270 | 7.48031        | 2.36548    | 95.9759                          | 106.6781    | 86.88   | 115.38  |
|       | Total        | 38 | 99.5397  | 6.38660        | 1.03604    | 97.4405                          | 101.6390    | 86.53   | 115.38  |
| week1 | Control      | 12 | 109.3850 | 6.81932        | 1.96857    | 105.0522                         | 113.7178    | 96.34   | 117.70  |
|       | Control+NaHS | 6  | 106.4867 | 7.08599        | 2.89284    | 99.0504                          | 113.9230    | 100.60  | 117.57  |
|       | L-NAME       | 10 | 117.4390 | 9.58404        | 3.03074    | 110.5830                         | 124.2950    | 93.90   | 128.05  |
|       | L-NAME+NaHS  | 10 | 115.1000 | 6.09030        | 1.92592    | 110.7433                         | 119.4567    | 105.34  | 124.70  |
|       | Total        | 38 | 112.5508 | 8.33090        | 1.35145    | 109.8125                         | 115.2891    | 93.90   | 128.05  |
| week2 | Control      | 12 | 113.1117 | 7.57608        | 2.18703    | 108.2981                         | 117.9253    | 99.88   | 125.91  |
|       | Control+NaHS | 6  | 112.7833 | 3.74135        | 1.52740    | 108.8570                         | 116.7096    | 105.90  | 116.40  |
|       | L-NAME       | 10 | 130.5820 | 7.32096        | 2.31509    | 125.3449                         | 135.8191    | 117.10  | 139.73  |
|       | L-NAME+NaHS  | 10 | 120.2240 | 4.69558        | 1.48487    | 116.8650                         | 123.5830    | 110.95  | 128.00  |
|       | Total        | 38 | 119.5289 | 9.55198        | 1.54954    | 116.3893                         | 122.6686    | 99.88   | 139.73  |
| week3 | Control      | 12 | 115.6608 | 7.09847        | 2.04915    | 111.1507                         | 120.1710    | 100.65  | 129.23  |
|       | Control+NaHS | 6  | 118.4333 | 4.61938        | 1.88585    | 113.5856                         | 123.2811    | 112.20  | 124.30  |
|       | L-NAME       | 10 | 142.5650 | 11.29621       | 3.57217    | 134.4842                         | 150.6458    | 126.99  | 159.60  |
|       | L-NAME+NaHS  | 10 | 129.0850 | 5.71011        | 1.80570    | 125.0002                         | 133.1698    | 122.00  | 140.50  |
|       | Total        | 38 | 126.7113 | 13.30423       | 2.15823    | 122.3383                         | 131.0843    | 100.65  | 159.60  |
| week4 | Control      | 12 | 115.3517 | 5.32147        | 1.53618    | 111.9706                         | 118.7328    | 107.98  | 124.75  |
|       | Control+NaHS | 6  | 119.3833 | 4.87623        | 1.99071    | 114.2660                         | 124.5006    | 113.10  | 125.50  |
|       | L-NAME       | 10 | 153.4740 | 9.66410        | 3.05606    | 146.5607                         | 160.3873    | 138.83  | 169.90  |
|       | L-NAME+NaHS  | 10 | 134.5010 | 5.31580        | 1.68100    | 130.6983                         | 138.3037    | 125.50  | 144.60  |
|       | Total        | 38 | 131.0597 | 16.80301       | 2.72581    | 125.5367                         | 136.5828    | 107.98  | 169.90  |
| week5 | Control      | 12 | 119.4750 | 4.31112        | 1.24451    | 116.7358                         | 122.2142    | 110.65  | 127.10  |
|       | Control+NaHS | 6  | 120.5000 | 4.61909        | 1.88574    | 115.6526                         | 125.3474    | 112.40  | 124.20  |
|       | L-NAME       | 10 | 161.3440 | 9.06192        | 2.86563    | 154.8615                         | 167.8265    | 149.10  | 175.00  |
|       | L-NAME+NaHS  | 10 | 137.2450 | 8.34342        | 2.63842    | 131.2765                         | 143.2135    | 124.18  | 156.27  |
|       | Total        | 38 | 135.3313 | 18.61183       | 3.01924    | 129.2138                         | 141.4489    | 110.65  | 175.00  |

**ANOVA**

|       |                | Sum of Squares | df | Mean Square | F      | Sig. |
|-------|----------------|----------------|----|-------------|--------|------|
| week0 | Between Groups | 61.878         | 3  | 20.626      | .485   | .695 |
|       | Within Groups  | 1447.301       | 34 | 42.568      |        |      |
|       | Total          | 1509.180       | 37 |             |        |      |
| week1 | Between Groups | 644.839        | 3  | 214.946     | 3.800  | .019 |
|       | Within Groups  | 1923.102       | 34 | 56.562      |        |      |
|       | Total          | 2567.941       | 37 |             |        |      |
| week2 | Between Groups | 1993.728       | 3  | 664.576     | 16.348 | .000 |
|       | Within Groups  | 1382.161       | 34 | 40.652      |        |      |
|       | Total          | 3375.889       | 37 |             |        |      |
| week3 | Between Groups | 4446.245       | 3  | 1482.082    | 23.963 | .000 |
|       | Within Groups  | 2102.852       | 34 | 61.849      |        |      |
|       | Total          | 6549.097       | 37 |             |        |      |
| week4 | Between Groups | 8921.367       | 3  | 2973.789    | 66.290 | .000 |
|       | Within Groups  | 1525.260       | 34 | 44.861      |        |      |
|       | Total          | 10446.627      | 37 |             |        |      |
| week5 | Between Groups | 11140.100      | 3  | 3713.367    | 75.299 | .000 |
|       | Within Groups  | 1676.702       | 34 | 49.315      |        |      |
|       | Total          | 12816.802      | 37 |             |        |      |

**Fig. 1F**

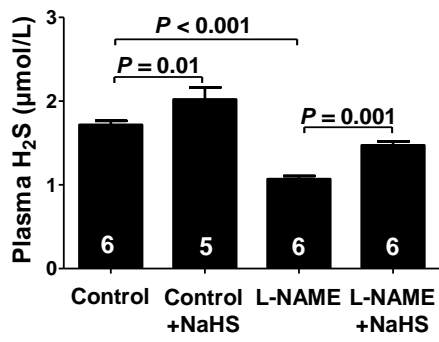

**Descriptives**

value

|              | N  | Mean   | Std. Deviation | Std. Error | 95% Confidence Interval for Mean |             | Minimum | Maximum |
|--------------|----|--------|----------------|------------|----------------------------------|-------------|---------|---------|
|              |    |        |                |            | Lower Bound                      | Upper Bound |         |         |
| Control      | 6  | 1.7173 | .11706         | .04779     | 1.5945                           | 1.8402      | 1.58    | 1.88    |
| Control+NaHS | 5  | 2.0210 | .31873         | .14254     | 1.6252                           | 2.4168      | 1.46    | 2.26    |
| L-NAME       | 6  | 1.0696 | .09083         | .03708     | .9743                            | 1.1649      | .93     | 1.15    |
| L-NAME+NaHS  | 6  | 1.4719 | .11686         | .04771     | 1.3493                           | 1.5945      | 1.39    | 1.69    |
| Total        | 23 | 1.5504 | .38629         | .08055     | 1.3833                           | 1.7174      | .93     | 2.26    |

**ANOVA**

value

|                | Sum of Squares | df | Mean Square | F      | Sig. |
|----------------|----------------|----|-------------|--------|------|
| Between Groups | 2.698          | 3  | .899        | 29.243 | .000 |
| Within Groups  | .584           | 19 | .031        |        |      |
| Total          | 3.283          | 22 |             |        |      |

**Fig. 1G**

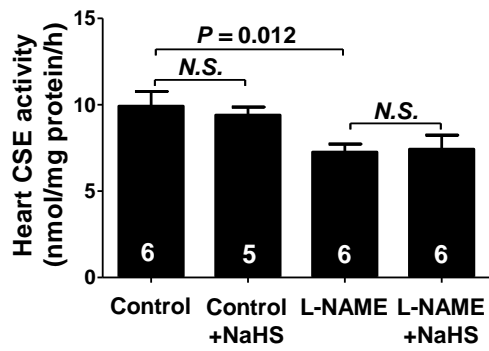

**Descriptives**

| value        | N  | Mean   | Std. Deviation | Std. Error | 95% Confidence Interval for Mean |             | Minimum | Maximum |
|--------------|----|--------|----------------|------------|----------------------------------|-------------|---------|---------|
|              |    |        |                |            | Lower Bound                      | Upper Bound |         |         |
| Control      | 6  | 9.9200 | 2.09617        | .85576     | 7.7202                           | 12.1198     | 7.35    | 13.02   |
| Control+NaHS | 5  | 9.4020 | 1.04810        | .46873     | 8.1006                           | 10.7034     | 8.14    | 10.82   |
| L-NAME       | 6  | 7.2650 | 1.13142        | .46190     | 6.0776                           | 8.4524      | 6.05    | 9.20    |
| L-NAME+NaHS  | 6  | 7.4350 | 1.98098        | .80873     | 5.3561                           | 9.5139      | 6.10    | 11.33   |
| Total        | 23 | 8.4665 | 1.95963        | .40861     | 7.6191                           | 9.3139      | 6.05    | 13.02   |

**ANOVA**

| value          | Sum of Squares | df | Mean Square | F     | Sig. |
|----------------|----------------|----|-------------|-------|------|
| Between Groups | 32.097         | 3  | 10.699      | 3.881 | .026 |
| Within Groups  | 52.386         | 19 | 2.757       |       |      |
| Total          | 84.483         | 22 |             |       |      |

**Fig. 2A**

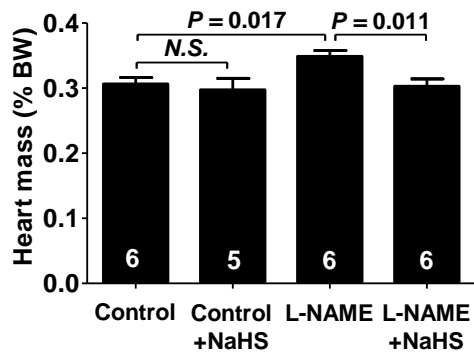

**Descriptives**

value

|              | N  | Mean  | Std. Deviation | Std. Error | 95% Confidence Interval for Mean |             | Minimum | Maximum |
|--------------|----|-------|----------------|------------|----------------------------------|-------------|---------|---------|
|              |    |       |                |            | Lower Bound                      | Upper Bound |         |         |
| Control      | 6  | .3065 | .02378         | .00971     | .2815                            | .3315       | .26     | .32     |
| Control+NaHS | 5  | .2974 | .03982         | .01781     | .2480                            | .3468       | .23     | .33     |
| L-NAME       | 6  | .3488 | .02192         | .00895     | .3258                            | .3718       | .32     | .38     |
| L-NAME+NaHS  | 6  | .3030 | .02720         | .01110     | .2745                            | .3315       | .29     | .36     |
| Total        | 23 | .3147 | .03370         | .00703     | .3001                            | .3292       | .23     | .38     |

**ANOVA**

value

|                | Sum of Squares | df | Mean Square | F     | Sig. |
|----------------|----------------|----|-------------|-------|------|
| Between Groups | .010           | 3  | .003        | 4.028 | .022 |
| Within Groups  | .015           | 19 | .001        |       |      |
| Total          | .025           | 22 |             |       |      |



**Fig. 2B**

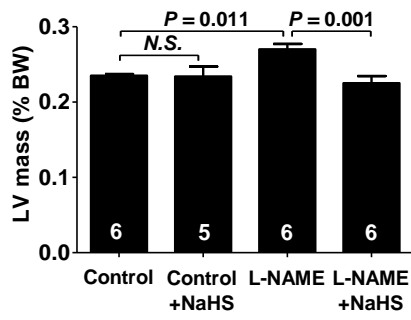

**Descriptives**

value

|              | N  | Mean  | Std. Deviation | Std. Error | 95% Confidence Interval for Mean |             | Minimum | Maximum |
|--------------|----|-------|----------------|------------|----------------------------------|-------------|---------|---------|
|              |    |       |                |            | Lower Bound                      | Upper Bound |         |         |
| Control      | 6  | .2350 | .00548         | .00224     | .2293                            | .2407       | .23     | .24     |
| Control+NaHS | 5  | .2340 | .02966         | .01327     | .1972                            | .2708       | .19     | .27     |
| L-NAME       | 6  | .2667 | .01211         | .00494     | .2540                            | .2794       | .25     | .28     |
| L-NAME+NaHS  | 6  | .2250 | .02345         | .00957     | .2004                            | .2496       | .21     | .27     |
| Total        | 23 | .2404 | .02440         | .00509     | .2299                            | .2510       | .19     | .28     |

**ANOVA**

value

|                | Sum of Squares | df | Mean Square | F     | Sig. |
|----------------|----------------|----|-------------|-------|------|
| Between Groups | .006           | 3  | .002        | 5.261 | .008 |
| Within Groups  | .007           | 19 | .000        |       |      |
| Total          | .013           | 22 |             |       |      |

**Fig. 3A**

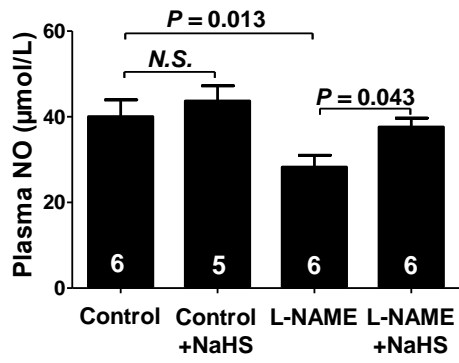

**Descriptives**

value

|              | N  | Mean    | Std. Deviation | Std. Error | 95% Confidence Interval for Mean |             | Minimum | Maximum |
|--------------|----|---------|----------------|------------|----------------------------------|-------------|---------|---------|
|              |    |         |                |            | Lower Bound                      | Upper Bound |         |         |
| Control      | 6  | 40.0513 | 9.56407        | 3.90451    | 30.0144                          | 50.0882     | 31.08   | 57.85   |
| Control+NaHS | 5  | 43.6923 | 7.93464        | 3.54848    | 33.8401                          | 53.5445     | 31.38   | 52.62   |
| L-NAME       | 6  | 28.2564 | 6.74798        | 2.75485    | 21.1748                          | 35.3380     | 18.15   | 37.23   |
| L-NAME+NaHS  | 6  | 37.6410 | 5.00193        | 2.04203    | 32.3918                          | 42.8902     | 31.69   | 44.31   |
| Total        | 23 | 37.1371 | 9.05161        | 1.88739    | 33.2229                          | 41.0513     | 18.15   | 57.85   |

**ANOVA**

value

|                | Sum of Squares | df | Mean Square | F     | Sig. |
|----------------|----------------|----|-------------|-------|------|
| Between Groups | 740.532        | 3  | 246.844     | 4.416 | .016 |
| Within Groups  | 1061.964       | 19 | 55.893      |       |      |
| Total          | 1802.496       | 22 |             |       |      |

**Fig. 3B**

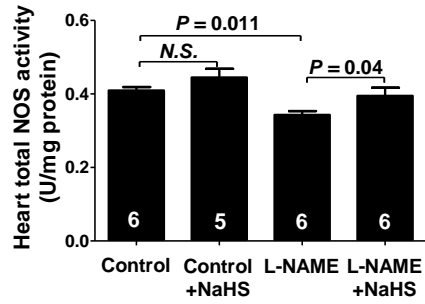

**Descriptives**

value

|              | N  | Mean  | Std. Deviation | Std. Error | 95% Confidence Interval for Mean |             | Minimum | Maximum |
|--------------|----|-------|----------------|------------|----------------------------------|-------------|---------|---------|
|              |    |       |                |            | Lower Bound                      | Upper Bound |         |         |
| Control      | 6  | .4094 | .02309         | .00943     | .3851                            | .4336       | .38     | .44     |
| Control+NaHS | 5  | .4449 | .05241         | .02344     | .3798                            | .5100       | .38     | .51     |
| L-NAME       | 6  | .3429 | .02538         | .01036     | .3162                            | .3695       | .30     | .37     |
| L-NAME+NaHS  | 6  | .3948 | .05400         | .02205     | .3381                            | .4515       | .33     | .49     |
| Total        | 23 | .3959 | .05285         | .01102     | .3731                            | .4188       | .30     | .51     |

**ANOVA**

value

|                | Sum of Squares | df | Mean Square | F     | Sig. |
|----------------|----------------|----|-------------|-------|------|
| Between Groups | .030           | 3  | .010        | 6.036 | .005 |
| Within Groups  | .031           | 19 | .002        |       |      |
| Total          | .061           | 22 |             |       |      |

**Fig. 3D**

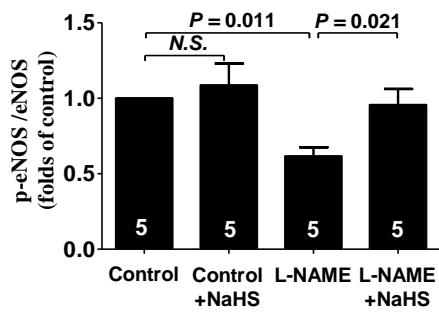

**Descriptives**

|              | N  | Mean   | Std. Deviation | Std. Error | 95% Confidence Interval for Mean |             | Minimum | Maximum |
|--------------|----|--------|----------------|------------|----------------------------------|-------------|---------|---------|
|              |    |        |                |            | Lower Bound                      | Upper Bound |         |         |
| Control      | 5  | 1.0000 | .00000         | .00000     | 1.0000                           | 1.0000      | 1.00    | 1.00    |
| Control+NaHS | 5  | 1.0860 | .32098         | .14355     | .6874                            | 1.4846      | .71     | 1.45    |
| L-NAME       | 5  | .6160  | .13315         | .05955     | .4507                            | .7813       | .43     | .76     |
| L-NAME+NaHS  | 5  | .9560  | .23744         | .10619     | .6612                            | 1.2508      | .66     | 1.31    |
| Total        | 20 | .9145  | .26619         | .05952     | .7899                            | 1.0391      | .43     | 1.45    |

**ANOVA**

|                | Sum of Squares | df | Mean Square | F     | Sig. |
|----------------|----------------|----|-------------|-------|------|
| Between Groups | .638           | 3  | .213        | 4.800 | .014 |
| Within Groups  | .709           | 16 | .044        |       |      |
| Total          | 1.346          | 19 |             |       |      |

**Fig. 3E**

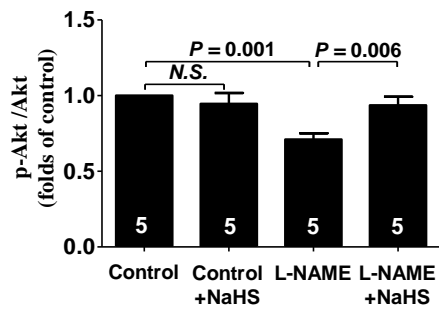

**Descriptives**

value

|              | N  | Mean   | Std. Deviation | Std. Error | 95% Confidence Interval for Mean |             | Minimum | Maximum |
|--------------|----|--------|----------------|------------|----------------------------------|-------------|---------|---------|
|              |    |        |                |            | Lower Bound                      | Upper Bound |         |         |
| Control      | 5  | 1.0000 | .00000         | .00000     | 1.0000                           | 1.0000      | 1.00    | 1.00    |
| Control+NaHS | 5  | .9460  | .16056         | .07181     | .7466                            | 1.1454      | .72     | 1.17    |
| L-NAME       | 5  | .7100  | .09274         | .04147     | .5949                            | .8251       | .62     | .84     |
| L-NAME+NaHS  | 5  | .9360  | .12542         | .05609     | .7803                            | 1.0917      | .82     | 1.14    |
| Total        | 20 | .8980  | .15354         | .03433     | .8261                            | .9699       | .62     | 1.17    |

**ANOVA**

value

|                | Sum of Squares | df | Mean Square | F     | Sig. |
|----------------|----------------|----|-------------|-------|------|
| Between Groups | .247           | 3  | .082        | 6.585 | .004 |
| Within Groups  | .200           | 16 | .013        |       |      |
| Total          | .448           | 19 |             |       |      |

**Fig. 4A**

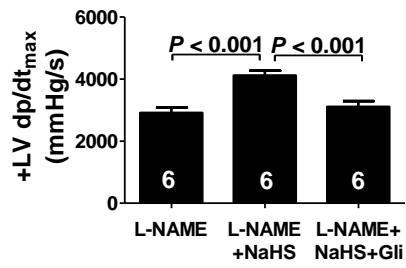

**Descriptives**

| value           | N  | Mean      | Std. Deviation | Std. Error | 95% Confidence Interval for Mean |             | Minimum | Maximum |
|-----------------|----|-----------|----------------|------------|----------------------------------|-------------|---------|---------|
|                 |    |           |                |            | Lower Bound                      | Upper Bound |         |         |
| L-NAME          | 6  | 2908.6000 | 433.81852      | 177.10567  | 2453.3354                        | 3363.8646   | 2689.30 | 3780.48 |
| L-NAME+NaHS     | 6  | 4114.6767 | 387.03858      | 158.00784  | 3708.5046                        | 4520.8487   | 3457.67 | 4497.28 |
| L-NAME+NaHS+Gli | 6  | 3055.1300 | 532.74570      | 217.49252  | 2496.0477                        | 3614.2123   | 2157.01 | 3456.57 |
| Total           | 18 | 3359.4689 | 699.01355      | 164.75907  | 3011.8576                        | 3707.0801   | 2157.01 | 4497.28 |

**ANOVA**

| value          | Sum of Squares | df | Mean Square | F      | Sig. |
|----------------|----------------|----|-------------|--------|------|
| Between Groups | 5197462        | 2  | 2598731.106 | 12.538 | .001 |
| Within Groups  | 3109077        | 15 | 207271.780  |        |      |
| Total          | 8306539        | 17 |             |        |      |

**Fig. 4B**

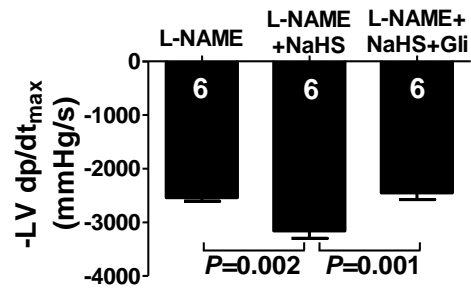

**Descriptives**

value

|                 | N  | Mean     | Std. Deviation | Std. Error | 95% Confidence Interval for Mean |             | Minimum  | Maximum  |
|-----------------|----|----------|----------------|------------|----------------------------------|-------------|----------|----------|
|                 |    |          |                |            | Lower Bound                      | Upper Bound |          |          |
| L-NAME          | 6  | -2538.87 | 169.41306      | 69.16259   | -2716.6614                       | -2361.0852  | -2787.89 | -2317.81 |
| L-NAME+NaHS     | 6  | -3159.91 | 338.51534      | 138.19831  | -3515.1551                       | -2804.6549  | -3757.53 | -2799.45 |
| L-NAME+NaHS+Gli | 6  | -2519.34 | 307.39872      | 125.49500  | -2841.9335                       | -2196.7432  | -2947.86 | -2075.07 |
| Total           | 18 | -2739.37 | 404.51221      | 95.34444   | -2940.5314                       | -2538.2130  | -3757.53 | -2075.07 |

**ANOVA**

value

|                | Sum of Squares | df | Mean Square | F      | Sig. |
|----------------|----------------|----|-------------|--------|------|
| Between Groups | 1592775        | 2  | 796387.602  | 10.047 | .002 |
| Within Groups  | 1188937        | 15 | 79262.465   |        |      |
| Total          | 2781712        | 17 |             |        |      |

**Fig. 4C**

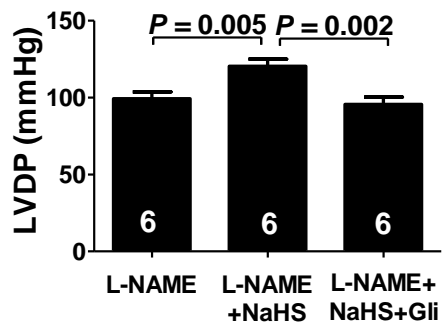

**Descriptives**

value

|                 | N  | Mean     | Std. Deviation | Std. Error | 95% Confidence Interval for Mean |             | Minimum | Maximum |
|-----------------|----|----------|----------------|------------|----------------------------------|-------------|---------|---------|
|                 |    |          |                |            | Lower Bound                      | Upper Bound |         |         |
| L-NAME          | 6  | 97.9533  | 9.19434        | 3.75357    | 88.3045                          | 107.6022    | 80.78   | 104.56  |
| L-NAME+NaHS     | 6  | 120.4367 | 11.21710       | 4.57936    | 108.6650                         | 132.2083    | 107.45  | 138.15  |
| L-NAME+NaHS+Gli | 6  | 95.5533  | 11.88765       | 4.85311    | 83.0780                          | 108.0287    | 77.50   | 108.71  |
| Total           | 18 | 104.6478 | 15.37618       | 3.62420    | 97.0014                          | 112.2942    | 77.50   | 138.15  |

**ANOVA**

value

|                | Sum of Squares | df | Mean Square | F     | Sig. |
|----------------|----------------|----|-------------|-------|------|
| Between Groups | 2260.881       | 2  | 1130.441    | 9.643 | .002 |
| Within Groups  | 1758.378       | 15 | 117.225     |       |      |
| Total          | 4019.259       | 17 |             |       |      |



**Fig. 4D**

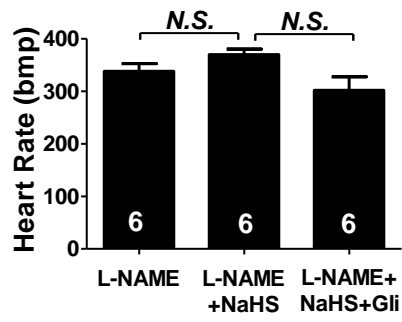

**Descriptives**

value

|                 | N  | Mean     | Std. Deviation | Std. Error | 95% Confidence Interval for Mean |             | Minimum | Maximum |
|-----------------|----|----------|----------------|------------|----------------------------------|-------------|---------|---------|
|                 |    |          |                |            | Lower Bound                      | Upper Bound |         |         |
| L-NAME          | 6  | 338.3333 | 35.25148       | 14.39136   | 301.3392                         | 375.3275    | 292.00  | 380.00  |
| L-NAME+NaHS     | 6  | 369.8333 | 26.34704       | 10.75614   | 342.1838                         | 397.4829    | 324.00  | 403.00  |
| L-NAME+NaHS+Gli | 6  | 302.0000 | 63.04919       | 25.73972   | 235.8339                         | 368.1661    | 247.00  | 402.00  |
| Total           | 18 | 336.7222 | 50.51943       | 11.90754   | 311.5995                         | 361.8449    | 247.00  | 403.00  |

**ANOVA**

value

|                | Sum of Squares | df | Mean Square | F     | Sig. |
|----------------|----------------|----|-------------|-------|------|
| Between Groups | 13827.444      | 2  | 6913.722    | 3.508 | .056 |
| Within Groups  | 29560.167      | 15 | 1970.678    |       |      |
| Total          | 43387.611      | 17 |             |       |      |

**Fig. 4E**

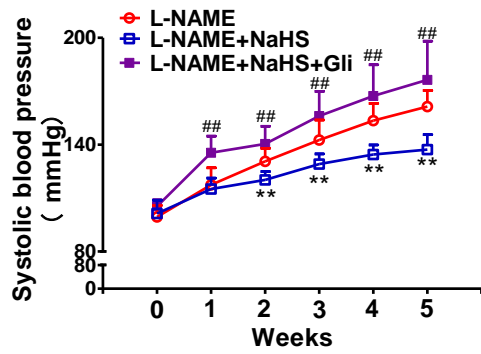

**Descriptives**

|                 | N  | Mean     | Std. Deviation | Std. Error | 95% Confidence Interval for Mean |             | Minimum | Maximum |
|-----------------|----|----------|----------------|------------|----------------------------------|-------------|---------|---------|
|                 |    |          |                |            | Lower Bound                      | Upper Bound |         |         |
| week0           |    |          |                |            |                                  |             |         |         |
| L-NAME          | 10 | 99.4140  | 6.43491        | 2.03490    | 94.8107                          | 104.0173    | 88.10   | 107.38  |
| L-NAME+NaHS     | 10 | 101.3270 | 7.48031        | 2.36548    | 95.9759                          | 106.6781    | 86.88   | 115.38  |
| L-NAME+NaHS+Gli | 6  | 105.3333 | 3.67188        | 1.49904    | 101.4799                         | 109.1867    | 102.10  | 110.50  |
| Total           | 26 | 101.5158 | 6.55944        | 1.28641    | 98.8664                          | 104.1652    | 86.88   | 115.38  |
| week1           |    |          |                |            |                                  |             |         |         |
| L-NAME          | 10 | 117.4390 | 9.58404        | 3.03074    | 110.5830                         | 124.2950    | 93.90   | 128.05  |
| L-NAME+NaHS     | 10 | 115.1000 | 6.09030        | 1.92592    | 110.7433                         | 119.4567    | 105.34  | 124.70  |
| L-NAME+NaHS+Gli | 6  | 135.4633 | 9.35353        | 3.81856    | 125.6474                         | 145.2793    | 120.20  | 149.60  |
| Total           | 26 | 120.6988 | 11.53366       | 2.26194    | 116.0403                         | 125.3574    | 93.90   | 149.60  |
| week2           |    |          |                |            |                                  |             |         |         |
| L-NAME          | 10 | 130.5820 | 7.32096        | 2.31509    | 125.3449                         | 135.8191    | 117.10  | 139.73  |
| L-NAME+NaHS     | 10 | 120.2240 | 4.69558        | 1.48487    | 116.8650                         | 123.5830    | 110.95  | 128.00  |
| L-NAME+NaHS+Gli | 6  | 140.3833 | 9.92641        | 4.05244    | 129.9662                         | 150.8005    | 121.50  | 150.60  |
| Total           | 26 | 128.8600 | 10.47980       | 2.05526    | 124.6271                         | 133.0929    | 110.95  | 150.60  |
| week3           |    |          |                |            |                                  |             |         |         |
| L-NAME          | 10 | 142.5650 | 11.29621       | 3.57217    | 134.4842                         | 150.6458    | 126.99  | 159.60  |
| L-NAME+NaHS     | 10 | 129.0850 | 5.71011        | 1.80570    | 125.0002                         | 133.1698    | 122.00  | 140.50  |
| L-NAME+NaHS+Gli | 6  | 156.1167 | 13.78716       | 5.62858    | 141.6479                         | 170.5854    | 130.60  | 171.50  |
| Total           | 26 | 140.5077 | 14.42395       | 2.82877    | 134.6817                         | 146.3337    | 122.00  | 171.50  |
| week4           |    |          |                |            |                                  |             |         |         |
| L-NAME          | 10 | 153.4740 | 9.66410        | 3.05606    | 146.5607                         | 160.3873    | 138.83  | 169.90  |
| L-NAME+NaHS     | 10 | 134.5010 | 5.31580        | 1.68100    | 130.6983                         | 138.3037    | 125.50  | 144.60  |
| L-NAME+NaHS+Gli | 6  | 167.3333 | 17.51030       | 7.14855    | 148.9574                         | 185.7093    | 140.20  | 189.80  |
| Total           | 26 | 149.3750 | 16.66531       | 3.26834    | 142.6437                         | 156.1063    | 125.50  | 189.80  |
| week5           |    |          |                |            |                                  |             |         |         |
| L-NAME          | 10 | 161.3440 | 9.06192        | 2.86563    | 154.8615                         | 167.8265    | 149.10  | 175.00  |
| L-NAME+NaHS     | 10 | 137.2450 | 8.34342        | 2.63842    | 131.2765                         | 143.2135    | 124.18  | 156.27  |
| L-NAME+NaHS+Gli | 6  | 176.3833 | 21.74593       | 8.87774    | 153.5624                         | 199.2043    | 150.50  | 211.40  |
| Total           | 26 | 155.5458 | 20.02060       | 3.92636    | 147.4593                         | 163.6323    | 124.18  | 211.40  |

**ANOVA**

|       |                | Sum of Squares | df | Mean Square | F      | Sig. |
|-------|----------------|----------------|----|-------------|--------|------|
| week0 | Between Groups | 131.973        | 2  | 65.987      | 1.608  | .222 |
|       | Within Groups  | 943.682        | 23 | 41.030      |        |      |
|       | Total          | 1075.655       | 25 |             |        |      |
| week1 | Between Groups | 1727.677       | 2  | 863.839     | 12.434 | .000 |
|       | Within Groups  | 1597.954       | 23 | 69.476      |        |      |
|       | Total          | 3325.631       | 25 |             |        |      |
| week2 | Between Groups | 1572.181       | 2  | 786.091     | 15.407 | .000 |
|       | Within Groups  | 1173.473       | 23 | 51.021      |        |      |
|       | Total          | 2745.654       | 25 |             |        |      |
| week3 | Between Groups | 2808.945       | 2  | 1404.472    | 13.503 | .000 |
|       | Within Groups  | 2392.316       | 23 | 104.014     |        |      |
|       | Total          | 5201.260       | 25 |             |        |      |
| week4 | Between Groups | 4315.387       | 2  | 2157.694    | 18.884 | .000 |
|       | Within Groups  | 2627.927       | 23 | 114.258     |        |      |
|       | Total          | 6943.314       | 25 |             |        |      |
| week5 | Between Groups | 6290.601       | 2  | 3145.300    | 19.395 | .000 |
|       | Within Groups  | 3730.007       | 23 | 162.174     |        |      |
|       | Total          | 10020.608      | 25 |             |        |      |

**Fig. 4F**

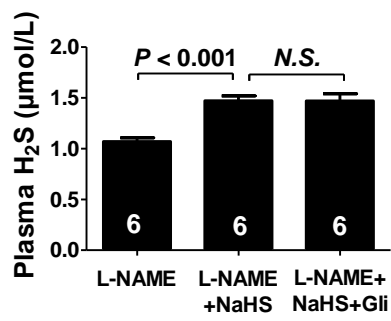

**Descriptives**

value

|                 | N  | Mean   | Std. Deviation | Std. Error | 95% Confidence Interval for Mean |             | Minimum | Maximum |
|-----------------|----|--------|----------------|------------|----------------------------------|-------------|---------|---------|
|                 |    |        |                |            | Lower Bound                      | Upper Bound |         |         |
| L-NAME          | 6  | 1.0696 | .09083         | .03708     | .9743                            | 1.1649      | .93     | 1.15    |
| L-NAME+NaHS     | 6  | 1.4719 | .11686         | .04771     | 1.3493                           | 1.5945      | 1.39    | 1.69    |
| L-NAME+NaHS+Gli | 6  | 1.4697 | .17331         | .07075     | 1.2878                           | 1.6516      | 1.29    | 1.76    |
| Total           | 18 | 1.3371 | .23054         | .05434     | 1.2224                           | 1.4517      | .93     | 1.76    |

**ANOVA**

value

|                | Sum of Squares | df | Mean Square | F      | Sig. |
|----------------|----------------|----|-------------|--------|------|
| Between Groups | .644           | 2  | .322        | 18.591 | .000 |
| Within Groups  | .260           | 15 | .017        |        |      |
| Total          | .903           | 17 |             |        |      |

**Fig. 4G**

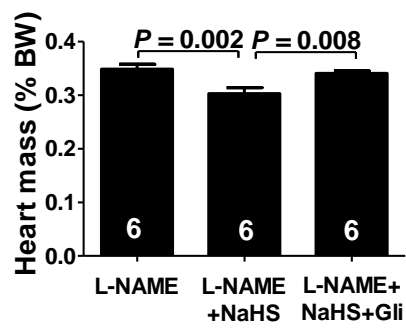

**Descriptives**

value

|                 | N  | Mean  | Std. Deviation | Std. Error | 95% Confidence Interval for Mean |             | Minimum | Maximum |
|-----------------|----|-------|----------------|------------|----------------------------------|-------------|---------|---------|
|                 |    |       |                |            | Lower Bound                      | Upper Bound |         |         |
| L-NAME          | 6  | .3488 | .02192         | .00895     | .3258                            | .3718       | .32     | .38     |
| L-NAME+NaHS     | 6  | .3030 | .02720         | .01110     | .2745                            | .3315       | .29     | .36     |
| L-NAME+NaHS+Gli | 6  | .3407 | .01136         | .00464     | .3287                            | .3526       | .33     | .36     |
| Total           | 18 | .3308 | .02861         | .00674     | .3166                            | .3451       | .29     | .38     |

**ANOVA**

value

|                | Sum of Squares | df | Mean Square | F     | Sig. |
|----------------|----------------|----|-------------|-------|------|
| Between Groups | .007           | 2  | .004        | 7.974 | .004 |
| Within Groups  | .007           | 15 | .000        |       |      |
| Total          | .014           | 17 |             |       |      |

Fig. 4H

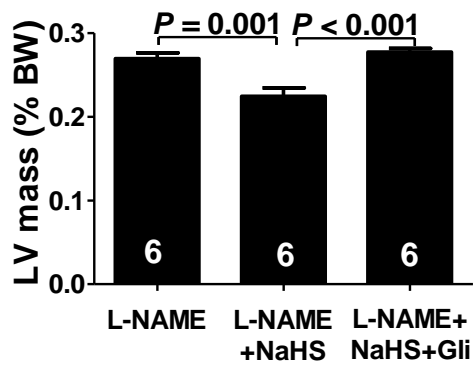

Descriptives

|                 | N  | Mean  | Std. Deviation | Std. Error | 95% Confidence Interval for Mean |             | Minimum | Maximum |
|-----------------|----|-------|----------------|------------|----------------------------------|-------------|---------|---------|
|                 |    |       |                |            | Lower Bound                      | Upper Bound |         |         |
| L-NAME          | 6  | .2695 | .01735         | .00708     | .2513                            | .2877       | .25     | .30     |
| L-NAME+NaHS     | 6  | .2247 | .02430         | .00992     | .1992                            | .2502       | .21     | .27     |
| L-NAME+NaHS+Gli | 6  | .2775 | .01025         | .00419     | .2667                            | .2883       | .26     | .29     |
| Total           | 18 | .2572 | .02942         | .00693     | .2426                            | .2719       | .21     | .30     |

ANOVA

|                | Sum of Squares | df | Mean Square | F      | Sig. |
|----------------|----------------|----|-------------|--------|------|
| Between Groups | .010           | 2  | .005        | 14.648 | .000 |
| Within Groups  | .005           | 15 | .000        |        |      |
| Total          | .015           | 17 |             |        |      |

**Fig. 4L**

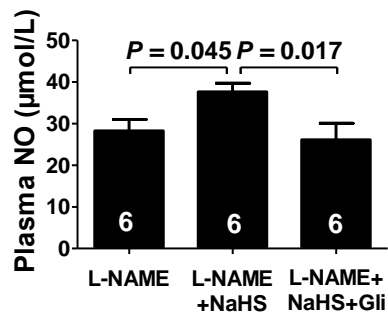

**Descriptives**

value

|                 | N  | Mean    | Std. Deviation | Std. Error | 95% Confidence Interval for Mean |             | Minimum | Maximum |
|-----------------|----|---------|----------------|------------|----------------------------------|-------------|---------|---------|
|                 |    |         |                |            | Lower Bound                      | Upper Bound |         |         |
| L-NAME          | 6  | 28.2564 | 6.74798        | 2.75485    | 21.1748                          | 35.3380     | 18.15   | 37.23   |
| L-NAME+NaHS     | 6  | 37.6410 | 5.00193        | 2.04203    | 32.3918                          | 42.8902     | 31.69   | 44.31   |
| L-NAME+NaHS+Gli | 6  | 26.1026 | 9.71142        | 3.96467    | 15.9111                          | 36.2941     | 10.77   | 39.08   |
| Total           | 18 | 30.6667 | 8.66373        | 2.04206    | 26.3583                          | 34.9750     | 10.77   | 44.31   |

**ANOVA**

value

|                | Sum of Squares | df | Mean Square | F     | Sig. |
|----------------|----------------|----|-------------|-------|------|
| Between Groups | 451.692        | 2  | 225.846     | 4.110 | .038 |
| Within Groups  | 824.331        | 15 | 54.955      |       |      |
| Total          | 1276.024       | 17 |             |       |      |

**Fig. 4M**

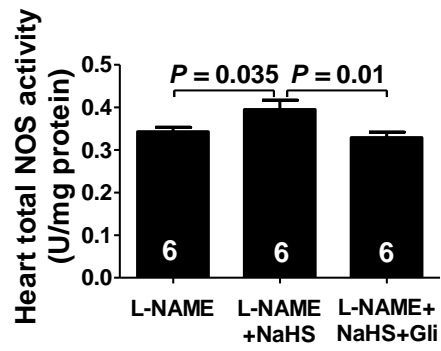

**Descriptives**

value

|                 | N  | Mean  | Std. Deviation | Std. Error | 95% Confidence Interval for Mean |             | Minimum | Maximum |
|-----------------|----|-------|----------------|------------|----------------------------------|-------------|---------|---------|
|                 |    |       |                |            | Lower Bound                      | Upper Bound |         |         |
| L-NAME          | 6  | .3429 | .02538         | .01036     | .3162                            | .3695       | .30     | .37     |
| L-NAME+NaHS     | 6  | .3948 | .05400         | .02205     | .3381                            | .4515       | .33     | .49     |
| L-NAME+NaHS+Gli | 6  | .3290 | .03120         | .01274     | .2963                            | .3618       | .29     | .36     |
| Total           | 18 | .3556 | .04671         | .01101     | .3323                            | .3788       | .29     | .49     |

**ANOVA**

value

|                | Sum of Squares | df | Mean Square | F     | Sig. |
|----------------|----------------|----|-------------|-------|------|
| Between Groups | .014           | 2  | .007        | 4.770 | .025 |
| Within Groups  | .023           | 15 | .002        |       |      |
| Total          | .037           | 17 |             |       |      |

**Fig. 40**

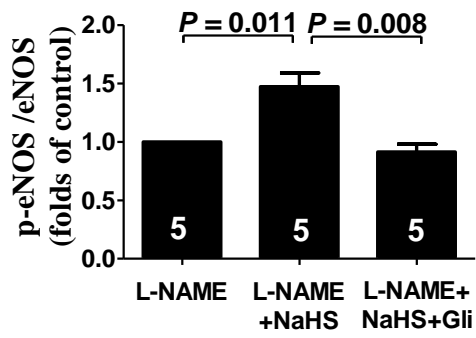

**Descriptives**

value

|                 | N  | Mean   | Std. Deviation | Std. Error | 95% Confidence Interval for Mean |             | Minimum | Maximum |
|-----------------|----|--------|----------------|------------|----------------------------------|-------------|---------|---------|
|                 |    |        |                |            | Lower Bound                      | Upper Bound |         |         |
| L-NAME          | 5  | 1.0000 | .00000         | .00000     | 1.0000                           | 1.0000      | 1.00    | 1.00    |
| L-NAME+NaHS     | 5  | 1.4740 | .26216         | .11724     | 1.1485                           | 1.7995      | 1.10    | 1.73    |
| L-NAME+NaHS+Gli | 5  | .9140  | .15076         | .06742     | .7268                            | 1.1012      | .80     | 1.15    |
| Total           | 15 | 1.1293 | .30182         | .07793     | .9622                            | 1.2965      | .80     | 1.73    |

**ANOVA**

value

|                | Sum of Squares | df | Mean Square | F      | Sig. |
|----------------|----------------|----|-------------|--------|------|
| Between Groups | .909           | 2  | .455        | 14.916 | .001 |
| Within Groups  | .366           | 12 | .030        |        |      |
| Total          | 1.275          | 14 |             |        |      |



**Fig. 4P**

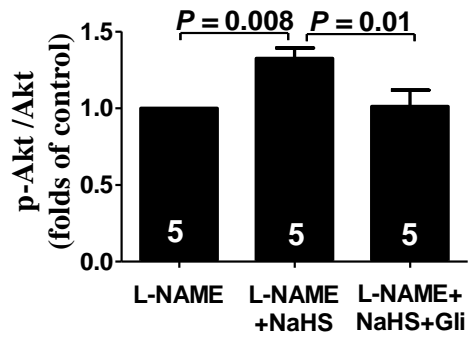

**Descriptives**

|                 | N  | Mean   | Std. Deviation | Std. Error | 95% Confidence Interval for Mean |             | Minimum | Maximum |
|-----------------|----|--------|----------------|------------|----------------------------------|-------------|---------|---------|
|                 |    |        |                |            | Lower Bound                      | Upper Bound |         |         |
|                 |    |        |                |            | L-NAME                           | 5           |         |         |
| L-NAME+NaHS     | 5  | 1.3260 | .15043         | .06728     | 1.1392                           | 1.5128      | 1.13    | 1.48    |
| L-NAME+NaHS+Gli | 5  | 1.0120 | .23826         | .10656     | .7162                            | 1.3078      | .67     | 1.28    |
| Total           | 15 | 1.1127 | .21701         | .05603     | .9925                            | 1.2328      | .67     | 1.48    |

**ANOVA**

|                | Sum of Squares | df | Mean Square | F     | Sig. |
|----------------|----------------|----|-------------|-------|------|
| Between Groups | .342           | 2  | .171        | 6.455 | .012 |
| Within Groups  | .318           | 12 | .026        |       |      |
| Total          | .659           | 14 |             |       |      |
